# Supplementary material
Source: publisher figshare collection journal article supplement (https://frontiersin.figshare.com/ndownloader/files/12752951)
Supplement: Supplementary file [file 12752951]

**The Cytochrome *bd* complex is essential for sulfide, sulfate and chromate resistance and is regulated by a GbsR-type regulator, CydE, in *Alishewanella* sp. WH16-1**

Xian Xia, Shijuan Wu, Liqiong Li, Biao Xu, Gejiao Wang\*

State Key Laboratory of Agricultural Microbiology, College of Life Sciences and Technology, Huazhong Agricultural University, Wuhan, 430070, P. R. China

**TABLE S1** Bacterial strains and plasmids used in this study

| Strains or plasmids                 | Relevant characteristic(s)                                                                                                                              | Source or reference   |
|-------------------------------------|---------------------------------------------------------------------------------------------------------------------------------------------------------|-----------------------|
| <b>Bacterial strains</b>            |                                                                                                                                                         |                       |
| <i>Alishewanella</i> sp.            |                                                                                                                                                         |                       |
| WH16-1                              | Wild type; Cr(VI) <sup>r</sup> ; Rif <sup>r</sup> , Km <sup>s</sup> , Tc <sup>s</sup> , Cm <sup>s</sup>                                                 | This study            |
| Δ <i>cytbd</i>                      | Mutant of WH16-1(Rif); Tn5 inserted in <i>cydB</i> ; Rif <sup>r</sup> , Km <sup>r</sup>                                                                 | This study            |
| Δ <i>cytbd</i> -C                   | Mutant of WH16-1(Rif) complemented with the <i>Cytbd</i> oxidase operon cloned in pCT-Zori vector; Rif <sup>r</sup> , Km <sup>r</sup> , Cm <sup>r</sup> | This study            |
| <i>Escherichia coli</i>             |                                                                                                                                                         |                       |
| <i>E. coli</i> S17-1(λ <i>pir</i> ) | <i>Tpr Smr recA thi pro hsdR<sup>-</sup> hsdM<sup>+</sup></i> . RP4:2Tc:Mu:Km                                                                           | (Chen et al., 2015a)  |
| <i>E. coli</i> DH5α                 | F <sup>-</sup> <i>endA1 hsdR17 supE44 thi-1 recA1 deoR gyrA96 relA1</i> Δ ( <i>argF-lacZYA</i> )U169 Φ80 <i>dlacZ</i> M15 λ <sup>-</sup>                | Promega               |
| XL1-Blue                            | Δ( <i>mcrA</i> )183Δ( <i>mcrCB-hsdSMR-mrr</i> )173 <i>endA1 supE44 thi-1 recA1 gyrA96 relA1lac</i> [F' <i>proAB lacIqZ</i> ΔM15 Tn5 Km <sup>r</sup> ]   | Stratagene            |
| BL21                                | B F <sup>-</sup> <i>dcm ompT hsdS</i> (r <sub>B</sub> <sup>-</sup> m <sub>B</sub> <sup>-</sup> ) <i>gal λ</i> (DE3)                                     | Novagen               |
| <b>Plasmids</b>                     |                                                                                                                                                         |                       |
| pRL27                               | Tn5-based transposon vector, <i>oriR6K</i> , Km <sup>r</sup>                                                                                            | (Larsen et al., 2002) |
| pCT-Zori                            | Cm <sup>r</sup>                                                                                                                                         | (Chen et al., 2015a)  |
| pCT-Zori- <i>cytbd</i>              | pCT-Zori vector cloned with the whole <i>cytbd</i> operon                                                                                               | This study            |
| pLSP                                | <i>lacZ</i> reporter gene vector                                                                                                                        | (Li et al., 2015)     |
| pLSP-Promoter                       | pLSP containing promoter region of <i>cytbd</i> operon                                                                                                  | This study            |
| pLSP-Promoter- <i>cydE</i>          | pLSP containing promoter and <i>cydE</i> coding region of <i>cytbd</i> operon                                                                           | This study            |
| pTRG                                | Tet <sup>r</sup> , for bacterial one-hybrid assay                                                                                                       | Stratagene            |
| pTRG- <i>cydE</i>                   | pTRG containing <i>cydE</i> coding region                                                                                                               | This study            |
| pBXcmT                              | Cm <sup>r</sup> , for bacterial one-hybrid assay                                                                                                        | (Guo et al., 2009)    |
| pBXcmT-Promoter                     | pBXcmT containing <i>cytbd</i> operon promoter region                                                                                                   | This study            |
| pET28a                              | His6 Tag expression vector, Km <sup>r</sup>                                                                                                             | Novagen               |
| pET28a- <i>cydE</i>                 | <i>cydE</i> in frame fusion to the multiple sites of pET-28a                                                                                            | This study            |

**TABLE S2** Primers used in this study

| Primer             | Sequence(5'-3')                    | Description                                                                            |
|--------------------|------------------------------------|----------------------------------------------------------------------------------------|
| tpnRL17-1          | AACAAGCCAGGGATGTAACG               | Used for plasmid rescue                                                                |
| tpnRL13-2          | CAGCAACACCTTCTTCACGA               |                                                                                        |
| <i>cydE-cydAF</i>  | TAGCCGCGGTAGTATCTG                 | Used to amplify <i>cydE-cydA</i>                                                       |
| <i>cydE-cydAR</i>  | GATGGTAATGGTTGGGAA                 |                                                                                        |
| <i>cydA-cydBF</i>  | GGTGTAGCCTGCGGTTGT                 | Used to amplify <i>cydA-cydB</i>                                                       |
| <i>cydA-cydBR</i>  | TCCCAGAACGGACCAATAG                |                                                                                        |
| <i>cytbdF</i>      | AAAGAGCTCGGTAAACCTTGCATTAAGT       | Used for complementation of WH16-1- <i>cydB</i> (Tn5)                                  |
| <i>cytbdR</i>      | AAAAAGCTTTCTCATTGTCTTATTAGTAATACTT |                                                                                        |
| LacPF              | AAAGAATTCGGTTAAACCTTGCATTAAGT      | Used for construction the <i>lacZ</i> reporter gene vector                             |
| LacPR              | AAAGGATCCCATTGGAGTCATTGCATA        |                                                                                        |
| LacP- <i>cydER</i> | AAAGGATCCACAGGTGGCAAAAACAG         | Used for construction <i>CydE</i> over-expression vector with pET28a                   |
| <i>cydEF</i>       | AAAGGATCCATGCAAATGACTCCAATG        |                                                                                        |
| <i>cydER</i>       | AAAAAGCTTGGCTTGTTTTGCCGGATC        | Used for bacterial one-hybrid experiment of <i>cytbd</i> cluster regulatory region DNA |
| BohpF              | AAAGGATCCATGCAAATGACTCCAATG        |                                                                                        |
| BohpR              | AAAGAATTCAGAACAACAGGTGGCAAA        | Used for construction of <i>CydE</i> protein expression vector with pTRG               |
| BohsF              | AAAGGATCCATGCAAATGACTCCAATG        |                                                                                        |
| BohsR              | AAAGAATTCAGAACAACAGGTGGCAAA        | Used to amplify promoter region sequence of <i>cytbd</i> cluster                       |
| PromoterF          | GGTTAAACCTTGCATTAAGT               |                                                                                        |
| PrompterR          | CATTGGAGTCATTGCATA                 | Used to amplify FAM labeled promoter region of <i>cytbd</i> operon                     |
| FAM-PrompterR      | FAM-CATTGGAGTCATTGCATA             |                                                                                        |

\* The underlined sequence denotes the restriction enzyme sites.

**A**

GGTTAAACCTTGCATTAAGTTAACGGCGTAACCTTAACCTTGATCCGTAATGAATGTTTCGCGGGTGAGTTTCAC  
TACTTTAGCAGTTCTATCAAGCCTTAACAGTCTGTGATAGAAAAGCCCAACTTTTTTCTGAATCGTGCGC  
TCAACGCCCACTAAATTCTTTAATTAGTTTCGAGCCATACCTGCAAATTATGTTGATCTGGATCAAGCAACA  
AGCGTATTATTATTCAGAAATTTCTGAAAGTTCAGTAACGGGATGCGCATATGCAAATGACTCCAATGATTG  
AATCCTTTGTTTACCACCTTTGGCGAAATGGGCAGCCGTTGGGGCTTTAACCGTACCCTTGGCCAAATTACG  
CCCTGCTGGTGATTAGCGAGCAACCGCTCTGTGCAATGAAATTGGTGAGCTGCTGGGGATTTCGCGCGG  
CAATGTCAGTATGGGGTTAAAAGAGTTGGGTAGCTGGCAGCTGGTGCAGGTTAGCCATAAACCCGGCGAG  
CGGCGCGAGTTTTATCATAGCCGCGGTAGTATCTGGGATATGGCCAACCGGGTGTGTTGAAGAGCGGCGCA  
AACGGGAAATGGACCCGACGCTTAGCTTACTGCGTGACATTATGATGGACGAAGCGGCTAATCCGGAAGA  
AGCCTTTGCCAAAAGCGCATGCGCGAAATTCACGATCTGCTGGAGAACATTACTGAATGGACGCAAAGCC  
TGCAATCCTTGTCGCCGAGAGCTGAATACCTTAATGAAGTTAGGCTCCGGCGTTGGCAAGGTACTGGA  
TTTACCGATAAGTTTTTAGGTAAAAAAGATCCGGCAAACAAGCCTAGCTGTTTTTGCCACCTGT

**B**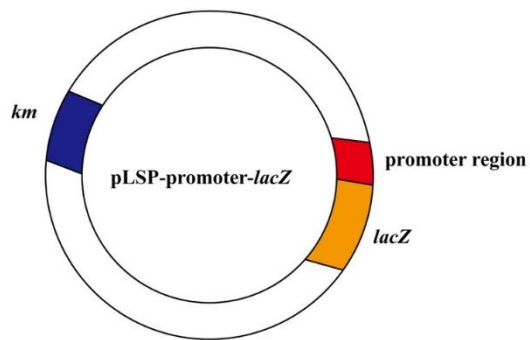**C**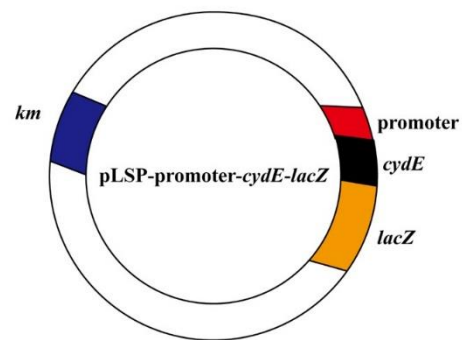

**FIG S1** Sequence of *cydE* and its promoter and the construction of related vectors. (A) The red nucleotides are the *cydE* promoter region and 18 nucleotides of *cydE*, and the underlined nucleotides are *cydE* coding sequence; (B) The *cydE* promoter sequence (red) was cloned into the pLSP-kt2*lacZ* plasmid to generate the pLSP-promoter-*lacZ* vector; (C) All of the sequence shown in “A” including *cydE* promoter and *cydE* was cloned into the pLSP-kt2*lacZ* plasmid to generate the pLSP-promoter-*cydE-lacZ* vector. For the construction of the pBX-promoter vector in the bacterial one-hybrid assay (FIG 5), the promoter sequence of *cydE* (red) was cloned into the pBXcmT plasmid.

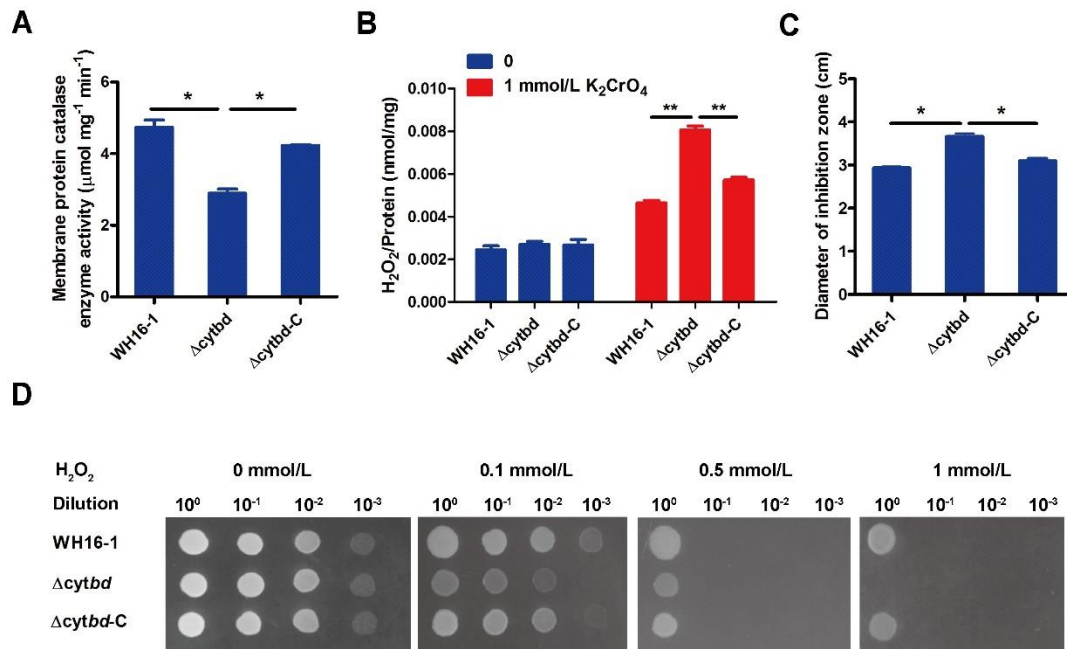

**FIG S2** Effects of Cytbd on the reduction of cellular oxidative stress in strain WH16-1, mutant  $\Delta\text{cytbd}$  and complementary strain  $\Delta\text{cytbd-C}$ . (A) The  $\text{H}_2\text{O}_2$  decomposition ability of membrane proteins. (B) Cellular  $\text{H}_2\text{O}_2$  contents with 0 and 1 mmol/L  $\text{K}_2\text{CrO}_4$ , respectively. (C) The inhibition zones when exposed to 3%  $\text{H}_2\text{O}_2$ . (D)  $\text{H}_2\text{O}_2$  sensitive tests on LB plates. Every sample was prepared in triplicates and the results are presented as mean values. \*, remarkable difference; \*\*, extremely remarkable difference.

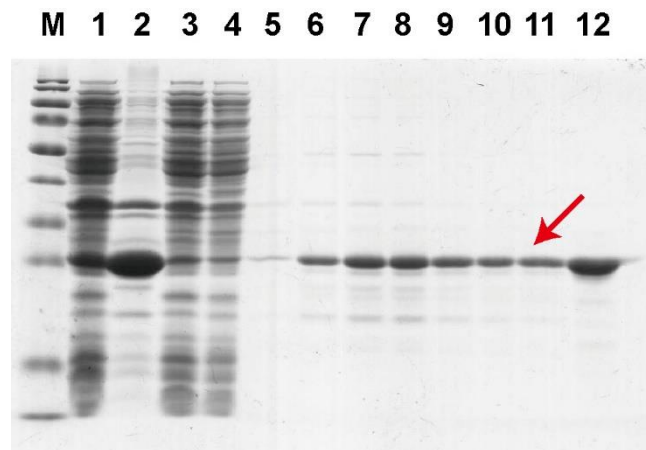

**FIG S3** Purification of CydE. Lanes 1 and 2 show cell lysis product suspensions and precipitates after centrifuging, respectively. Lanes 3-5 and 6-12 show proteins eluted from a nickel-ion affinity chromatography column by 200 and 500 mM imidazole, respectively. The red arrow marks proteins that were used in a subsequent EMSA test.
